# Supplementary material
Source: PubMed Central journal article supplement (PMC5882538)
Supplement: NIHMS938584-supplement-Supplemental_Digital_Content.pdf [file NIHMS938584-supplement-Supplemental_Digital_Content.pdf]

**eTable. Z Score Test Results**

| Analyte                      | Batch 1 vs Others | Batch 2 vs Others | Batch 3 vs Others | Batch 4 vs Others | Batch 5 vs Others | Batch 6 vs Others |
|------------------------------|-------------------|-------------------|-------------------|-------------------|-------------------|-------------------|
| Albumin                      | -3.17             | -1.59             | -2.76             | <b>60.02</b>      | -1.97             | -1.22             |
| ALT <sup>a</sup>             | -1.83             | 0                 | 0.63              | <b>3.30</b>       | -1.21             | -0.61             |
| AST <sup>a</sup>             | -1.46             | -0.27             | -1.95             | <b>4.73</b>       | -0.27             | -0.26             |
| C-Reactive Protein           | 1.03              | 1.03              | 1.03              | <b>-9.61</b>      | 1.03              | 2.84              |
| Calcium                      | -3.02             | -2.31             | -2.31             | <b>65.19</b>      | -2.14             | -0.97             |
| Chloride                     | -4.18             | -1.42             | -1.76             | <b>50.68</b>      | -2.29             | -1.08             |
| Cholesterol                  | -3.54             | -0.74             | -1.79             | <b>21.72</b>      | -2.04             | -1.46             |
| Cortisol                     | -2.08             | -1.00             | -1.72             | <b>14.26</b>      | -2.74             | -0.70             |
| Creatinine                   | -3.09             | 1.22              | -2.31             | <b>22.64</b>      | -1.71             | -3.95             |
| Estradiol                    | -0.40             | -0.62             | 0.17              | <b>1.68</b>       | -0.26             | -0.52             |
| Glucose                      | -2.97             | -2.03             | -1.69             | <b>35.97</b>      | -1.25             | -2.14             |
| HDL <sup>a</sup> Cholesterol | -0.47             | -0.70             | -4.35             | <b>11.72</b>      | -1.71             | -0.70             |
| LDH <sup>a</sup>             | -6.30             | -3.31             | -0.47             | <b>17.76</b>      | 1.06              | -1.14             |
| LH <sup>a</sup>              | -0.99             | -0.64             | -0.42             | <b>3.18</b>       | -1.25             | 0.39              |
| Phosphate                    | -2.76             | -1.17             | -3.37             | <b>26.70</b>      | 0.33              | -3.31             |
| Potassium                    | -3.58             | -1.79             | -1.79             | <b>83.90</b>      | -1.79             | -1.79             |
| Protein                      | -3.46             | -2.06             | -2.28             | <b>45.44</b>      | -1.17             | -1.16             |
| SHBG <sup>a</sup>            | 1.90              | 0.49              | 1.23              | <b>-9.00</b>      | 2.06              | 1.47              |
| Sodium                       | -2.34             | -1.66             | -1.66             | <b>149.11</b>     | -1.76             | -1.47             |
| Triglycerides                | -2.57             | -1.25             | -2.45             | <b>19.09</b>      | -2.15             | -1.10             |
| Urea Nitrogen                | -3.31             | -1.36             | -0.45             | <b>12.35</b>      | -0.45             | -2.26             |

<sup>a</sup> ALT (alanine transaminase), AST (aspartate transaminase), HDL (high-density lipoprotein), LDH (lactate dehydrogenase), LH (luteinizing hormone), SHBG (sex hormone binding globulin)
